# Supplementary material for: Clinical Global Impression – Corrections (CGI-C) – deutsche Übersetzung
Source: Springer Nature journal article supplement (doi:10.1007/s11757-020-00599-9), 2020-04-29
Supplement: MOESM1 [file 17941348]

## The Clinical Global Impression – Corrections (CGI –C)

Der CGI-C ist ein klinisches Diagnostikinstrument, das auf dem CGI basiert und an die Besonderheiten des Vollzuges adaptiert wurde. Der allgemeine Schweregrad einer psychischen Störung wird auf einer Skala von 1 bis 7 anhand des Verlaufs der vergangenen 24 Stunden eingeschätzt.

Der Begriff „psychische Störung“ umfasst psychiatrische Erkrankungen (z.B. Depression/Schizophrenie), Missbrauch-/Abhängigkeitserkrankungen, Persönlichkeitsstörungen, tiefgreifende Entwicklungsstörungen, Intelligenzminderungen, hirnorganische Störungen, Zustände nach Gehirnverletzungen (z.B. Meningitis, Gehirnerschütterung) und vorübergehende Zustände wie z.B. Intoxikation oder Entzugerscheinungen. Ebenso sind Verhaltensmanifestationen der genannten Störungen inbegriffen (wie z.B. Selbstverletzung, Selbstmordversuche, wiederholte oder ernsthafte Gewalttätigkeiten). Nicht beinhaltet sind klinische Auffälligkeiten, welche durch körperliche Erkrankungen verursacht werden,- außer es handelt sich um sogenannte Somatisierungen.

Es ist zu beachten, dass etwaige Sicherheitsverfügungen einer Person nicht per se einen Einfluss auf die CGI-C Einschätzung nehmen sollten. Der CGI-C sollte auf einem gesamtklinischen Eindruck basieren, mit allen in der jeweiligen Institution zur Verfügung stehenden Informationen. So sollte z.B. ein Gefangener, der sich in einer Hochsicherheitsabteilung befindet, unter Berücksichtigung der Möglichkeiten auf dieser Abteilung, und nicht im Vergleich mit den Möglichkeiten auf anderen Abteilungen oder den der Gesellschaft eingeschätzt werden (d.h. Einschätzung im jeweiligen Referenzrahmen treffen). Wenn die Person jedoch aufgrund der psychischen Verfassung bzw. Symptomatik auf eine Krankenstation oder in eine Beobachtungszelle verlegt wurde, so hat dieses Einfluss auf die Beurteilung gemäß CGI-C.

Für die Einschätzung sollten Informationen aus einer klinischen Einschätzung durch ein Interview (b), sowie fremdanamnestische Angaben (v.a. Justizvollzugsbeamte, Krankenpfleger\*Innen, Akten bzw. Dokumentationen; a) herangezogen werden.

In Situationen, in welchen Inhaftierte durch eine psychische Störung unfähig oder nicht gewillt sind, an einer klinischen Untersuchung teilzunehmen oder nur in einem eingeschränkten Maße teilnehmen können, muss die Beurteilung des CGI-C auf Informationen basieren, die sie sich durch die Beobachtung der Person in ihrem aktuellen Umfeld sowie fremdanamnestische Beobachtungen ergeben.

Für weitere Informationen/ Rückfragen kontaktieren Sie bitte die Autoren:

Carola Billen; Abteilung für Forensische Psychiatrie und Psychotherapie II, LVR- Klinik Köln, Wilhelm-Griesinger-Straße 23, 51109 Köln, Nordrhein-Westfalen, Deutschland E-Mail: [Carola.Billen@lvr.de](mailto:Carola.Billen@lvr.de)/ [cbillen@gmx.net](mailto:cbillen@gmx.net)

Michel A. Schulte Ostermann; Institut für Sexualmedizin und Forensische Psychiatrie und Psychotherapie (ISFP), Niemannsweg 147, 24105 Kiel, Schleswig-Holstein, Deutschland [Michel.SchulteOstermann@uksh.de](mailto:Michel.SchulteOstermann@uksh.de)

## **Bewertung:**

### **1. Keine psychische Störung**

- a.** Fremdanamnestic Informationen/ Umfeld/ Akten: Teilnahme an verfügbaren Angeboten/ Arbeitsmöglichkeiten/ Aufgaben, angemessenes (Sozial-)Verhalten, kein Fehlverhalten oder kriminelle Aktivität.
- b.** Beobachtung/Interview: Kein Hinweis auf psychische Störungen. Evtl. anamnestic Symptome oder Diagnosen, aber gegenwärtig keine Symptomatik.

### **2. Grenzwertige psychische Störung**

- a.** Fremdanamnestic Informationen/ Umfeld/ Akten: Gutes Funktionsniveau. Probleme, die sich nicht auf die Alltagsfähigkeiten auswirken und/oder vom Personal bemerkt werden.
- b.** Beobachtung/Interview: Insgesamt gutes Funktionsniveau. (Eventuell) keine Vordiagnose /-behandlung. Sehr leichte oder selten auftretende Symptome, die nicht die Kriterien einer psychiatrischen Erkrankung nach ICD-10 vollständig erfüllen oder die Person nur minimal belasten oder das Funktionsniveau minimal beeinträchtigen.

### **3. Leichte psychische Störung**

- a.** Fremdanamnestic Informationen/ Umfeld/ Akten: Gutes Funktionsniveau. Probleme, die das Funktionsniveau kaum beeinträchtigen, sodass dies durch Mitarbeiter meist nicht bemerkt wird.
- b.** Beobachtung/Interview: Deutliche aber leichte Symptome einer psychischen Erkrankung. Evtl. wird die Person bereits behandelt, weist jedoch nur (leichte) Restsymptomatik auf oder hat eine grenzwertige Intelligenz (z.B. Lernbehinderung).

### **4. Mittelgradige psychische Störung**

- a.** Fremdanamnestic Informationen/ Umfeld/ Akten: Teilweise dysfunktional. Könnte z.B. von den Justizvollzugsbeamten als „merkwürdig“ oder „unpassend/ungewöhnlich“ beschrieben werden, jedoch nicht explizit störend. Evtl. leichte Selbstverletzungen, laute Geräusche aus der Zelle (z.B.: Schreien, Schlagen gegen Wände/Tür) ohne dabei physisch gewalttätig zu werden. Evtl. Schwierigkeiten mit der Hygiene. Funktionsniveau kann durch physikalische Manifestationen oder Entzugserscheinungen beeinträchtigt sein. Insgesamt aber im Kontakt kooperativ.
- b.** Beobachtung/Interview: Deutliche Symptome einer psychischen Erkrankung. Falls bereits eine Behandlung erfolgt ist, ist diese entweder nicht effektiv oder moderate Symptome bestehen fort. Suizidale/homizidale bzw. eigen- oder fremdgefährdende Gedanken können vorhanden sein.

### **5. Deutlich (erkennbare) psychische Störung**

- a.** Fremdanamnestic Informationen/ Umfeld/ Akten: Beeinträchtigt Funktionsniveau, ggf. deutliche verbale Aggressionen, wiederholte Selbstverletzungen, ist unkooperativ im Umgang mit den Mitarbeiter\*Innen, Schreien oder Randalieren in der Zelle für erhebliche Anteile des Tages. Angemessene Interaktionen mit anderen sind minimal. Häufig unter „besonderer Behandlung“ (Sicherheitsverfügungen etc.) innerhalb der Abteilung/Institution, wenn die Person eine Gefahr für andere darstellt.
- b.** Beobachtung/Interview: Offensichtliche Symptome einer psychischen Erkrankung. Deutliche Beeinträchtigungen/Belastung (Leidensdruck), mit möglichen Suizidgedanken, signifikante Selbstverletzungen und/oder psychotische Symptome. Essen und Trinken erfolgt ausreichend. Vernachlässigung der Hygiene. Ggf. stationäre Aufnahme notwendig, falls nicht bereits erfolgt.

### **6. Schwere psychische Störung**

- a.** Fremdanamnestic Informationen/ Umfeld/ Akten: Schwere Beeinträchtigungen des Funktionsniveaus. Justizvollzugsbeamte berichten über die Auffälligkeiten. Vermutlich treten Störungen des Tagesablaufes auf, hohe Wahrscheinlichkeit für, oder tatsächlich stattfindende physische Gewalt, Verschmutzungen mit Exkrementen,

Urinieren außerhalb der Toilette, Nötigungsversuche, die zum Zugriff der Mitarbeiter\*Innen führen- evtl. Absonderung. Impulsives und unvorhersehbares Verhalten. Häufig Sicherheitsverfügungen oder Absonderung innerhalb der Abteilung/Institution, wenn die Person eine Gefahr für andere darstellt.

**b.** Beobachtung/Interview: Schwere und dauerhafte Symptome einer psychischen Erkrankung. Person zeigt deutliche Einschränkungen, die das Funktionsniveau erheblich einschränken. Häufig zu schwer erkrankt um an einem klinischen Interview teilzunehmen. Benötigt mit hoher Wahrscheinlichkeit einer stationären Aufnahme, falls noch nicht erfolgt.

## **7. Schwerste psychische Störung**

**a.** Fremdanamnestic Informationen/ Umfeld/ Akten: Keine Funktionsfähigkeit vorhanden. Eventuell physisch gewalttätig, Versuche potenziell tödlicher Selbstverletzungen oder keine Flüssigkeits-/Nahrungsaufnahme. Sehr impulsives und unvorhersehbares Verhalten. Sicherheitsverfügungen oder Absonderung innerhalb der Abteilung/Institution, wenn die Person eine Gefahr für andere darstellt.

**b.** Beobachtung/Interview: Schwere und dauerhafte Symptome einer psychischen Erkrankung, evtl. katatone Zustände oder sehr starke Anspannung, Auftreten auffälliger Verhaltensweisen, wie z.B. potentiell tödliche Selbstverletzungen oder Essen von Exkrementen. Dringende Krankenhausaufnahme notwendig, wenn nicht bereits stationär untergebracht.
